# Supplementary material
Source: PubMed Central journal article supplement (PMC3557615)
Supplement: NIHMS432589-supplement-01.pdf [file NIHMS432589-supplement-01.pdf]

# Sulfobetaine as a zwitterionic mediator for 3D hydroxyapatite mineralization

Pingsheng Liu and Jie Song\*

Department of Orthopedics & Physical Rehabilitation, Department of Cell and Developmental Biology, University of Massachusetts Medical School, 55 Lake Avenue North, Worcester, MA 01655, USA

## Classical Descriptions of Mineral Nucleation and Growth:

For a spherical nucleus, the activation energy of homogeneous nucleation  $\Delta G_N^*$ , nucleation rate  $J_N$ , and mineral growth rate  $J_G$  can be described as Equations S1, S2 and S3[1]:

$$\Delta G_N^* = 16\pi\sigma^3 v^2 / 3(kT \ln S_R)^2 \quad \text{Eq-S1}$$

where  $\sigma$  is interfacial free energy per unit surface area,  $v$  is molecular volume,  $S_R$  is relative supersaturation,  $k$  is the Boltzmann constant,  $T$  is absolute temperature.

$$J_N = A \exp[-\Delta G_N^*/kT] \quad \text{Eq-S2}$$

where  $A$  is a pre-exponential factor.

$$J_G = k_2(S_A)^x \quad \text{Eq-S3}$$

where,  $k_2$  is a rate constant,  $S_A$  is the absolute supersaturation, and  $x \geq 1$ .

## References cited:

[1] Mann S. *Biomineralization: Principles and Concepts in Bioinorganic Materials Chemistry*. Oxford: Oxford University Press; 2001.

Supplementary information

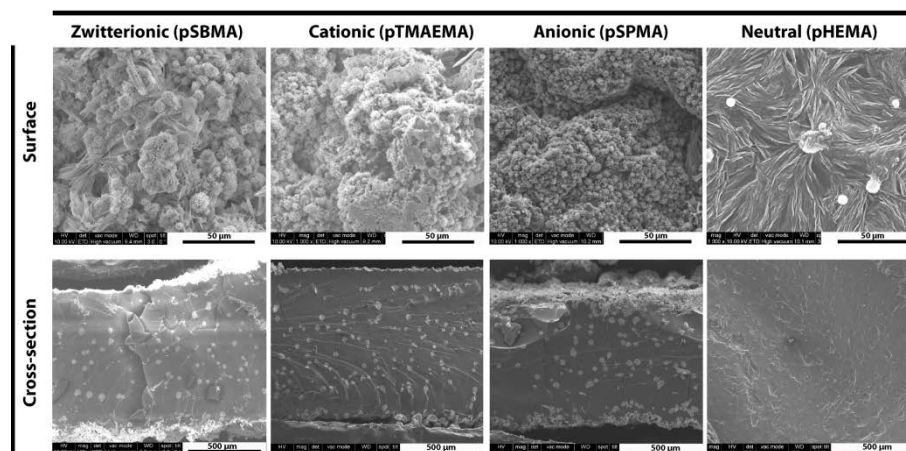

**Figure S1.** SEM micrographs revealing surface and cross-section mineral domain morphologies of the mineralized hydrogels containing identical crosslinker content (1.326 mol%) but varied side chain charges. All hydrogels were subjected to heterogeneous mineralization by controlled heating in an acidic solution of HA containing 2-M urea from 37 °C to 95 °C at a heating rate of 0.2 °C/min.

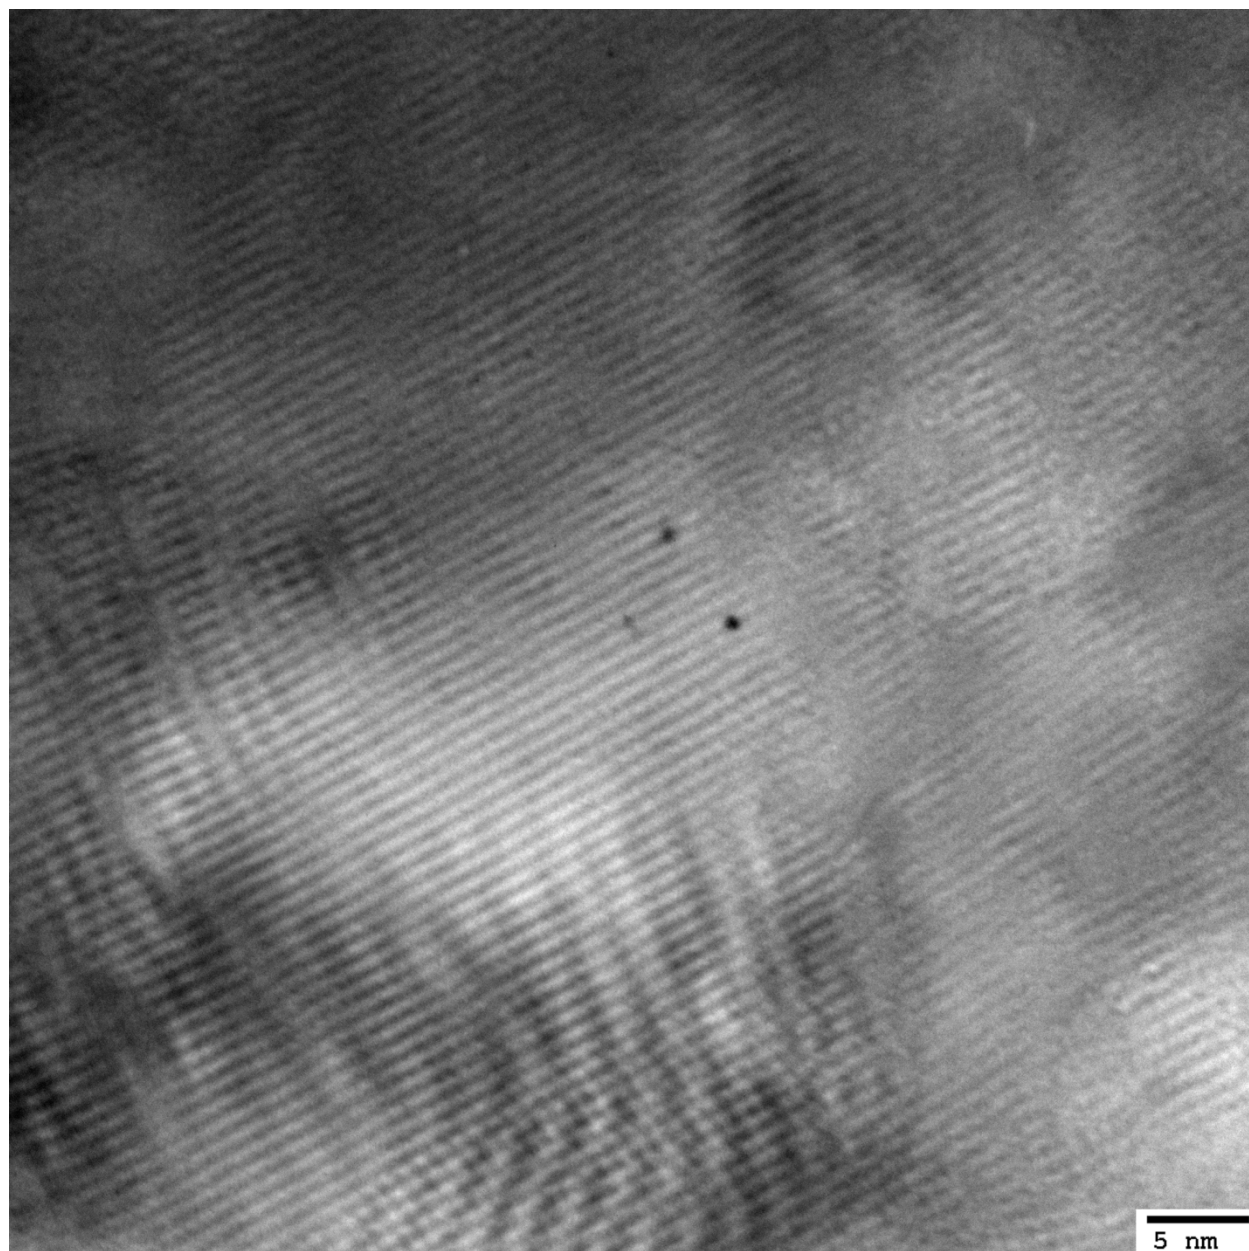

**Figure S2.** HR-TEM micrograph of the mineralized composite formed at the heating rate of 0.2 °C/min, suggesting predominantly crystalline phase of the mineral component.

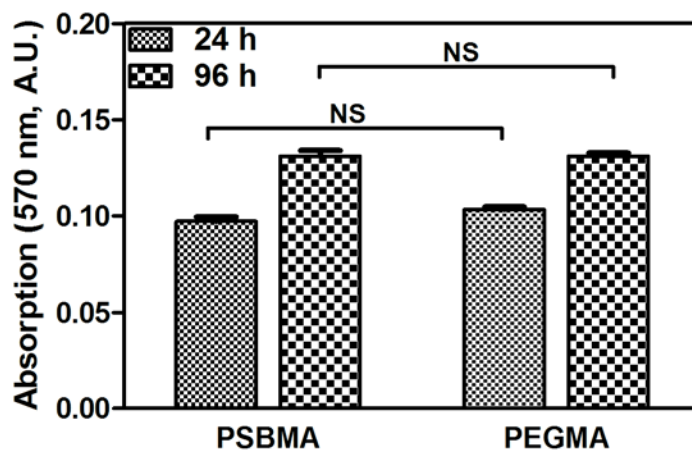

**Figure S3.** Cell viability of rMSC encapsulated by pSBMA and the PEGMA control (with identical crosslinker content of 1.33 mol%) as determined by MTT assay (n=3). No significant difference ( $p > 0.05$ ) was observed between the cells encapsulated by the 2 hydrogel formulations at a given time, while significant increases in viable cells were detected over time in each hydrogel formulation. Statistical significance was determined by one-way ANOVA with Tukey's multiple comparison.

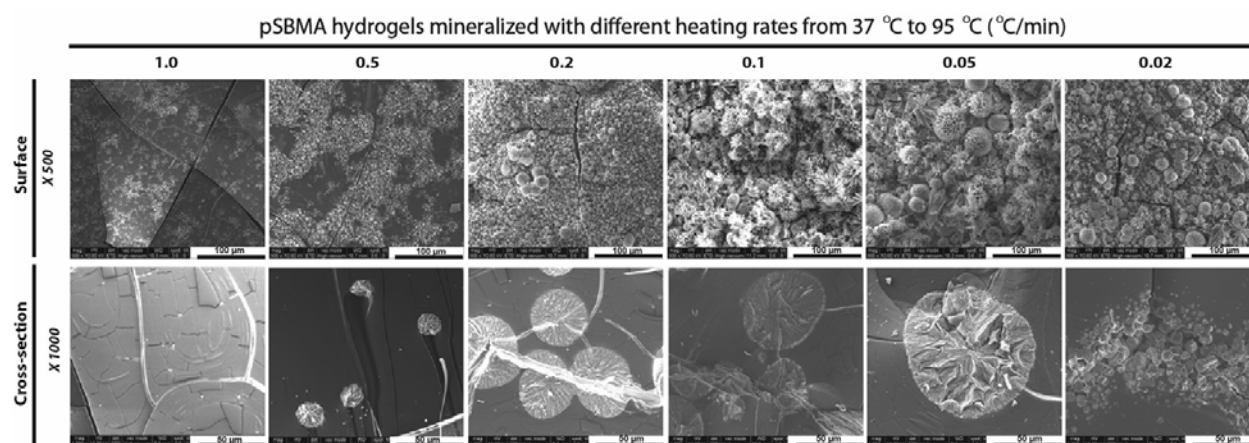

**Figure S4.** SEM micrographs of the surfaces and cross-sections of mineralized pSBMA hydrogels as a function of the heating rate. All mineralized hydrogel specimens contained the same crosslinker content of 0.265 mol%.

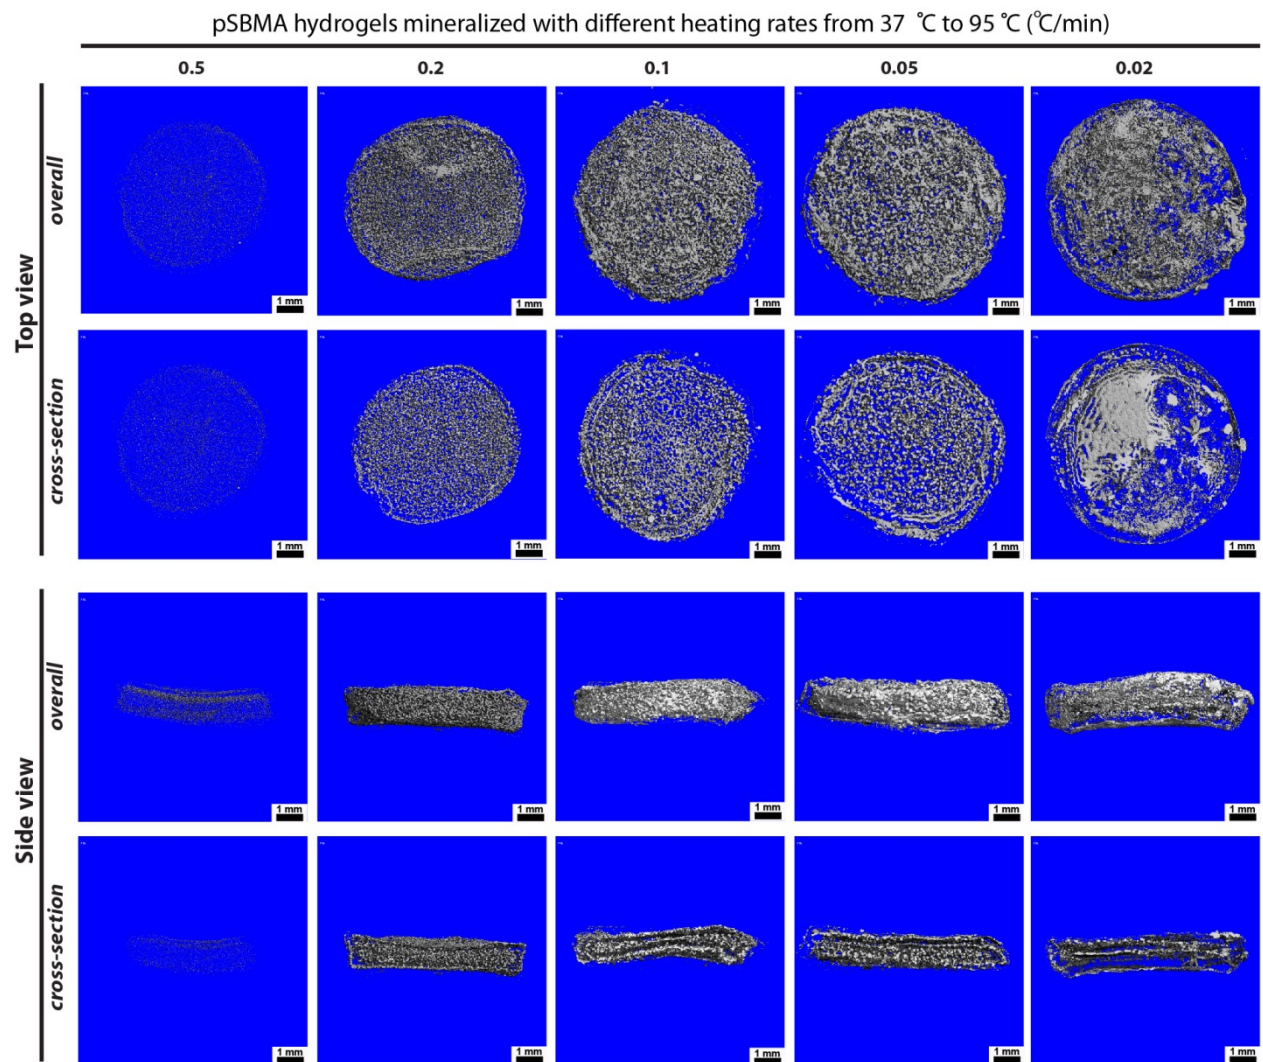

**Figure S5.** Reconstructed  $\mu$ -CT images of mineralized pSBMA hydrogels obtained with various heating rates. All mineralized hydrogel specimens contained the same crosslinker content of 0.265 mol%.

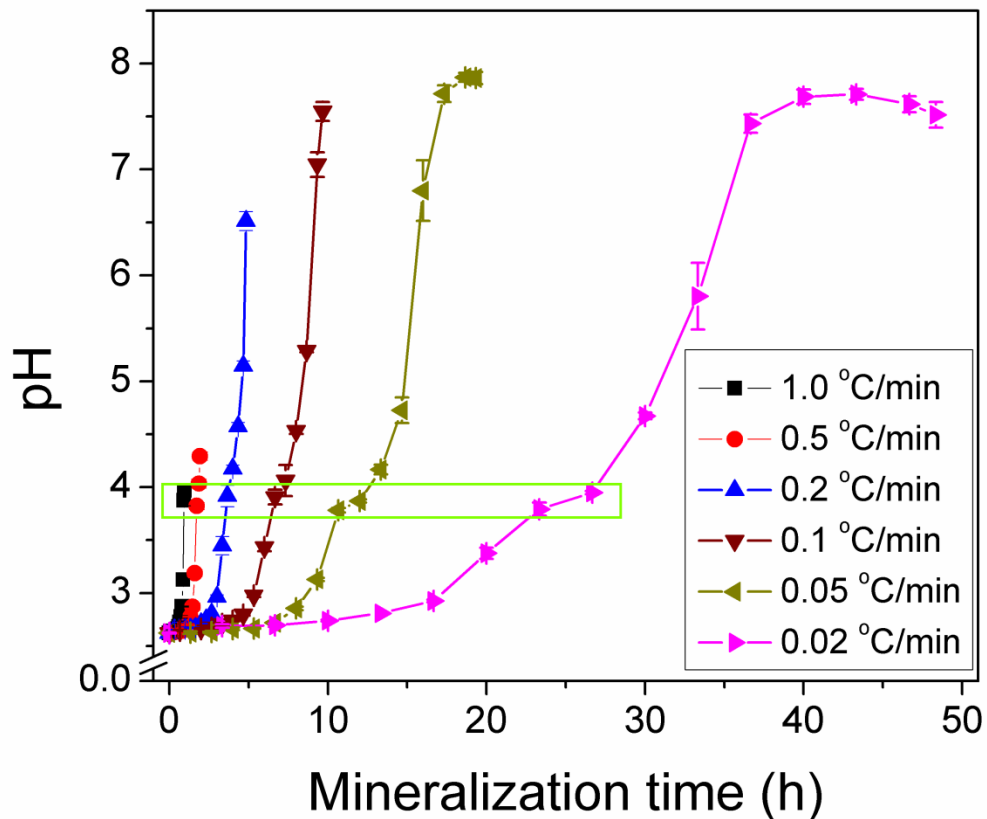

**Figure S6.** Temporal pH changes of the mineralization solution as a function of the heating rate and overall mineralization time (n=3). The first pH plateaus (from pH 3.8 to 4.0, indicated by the green box) observed in all six pH-mineralization time curves could be attributed to the deprotonation of  $\text{H}_2\text{PO}_4^-$  ions. All specimens contained the same hydrogel crosslinker content of 0.265 mol%.

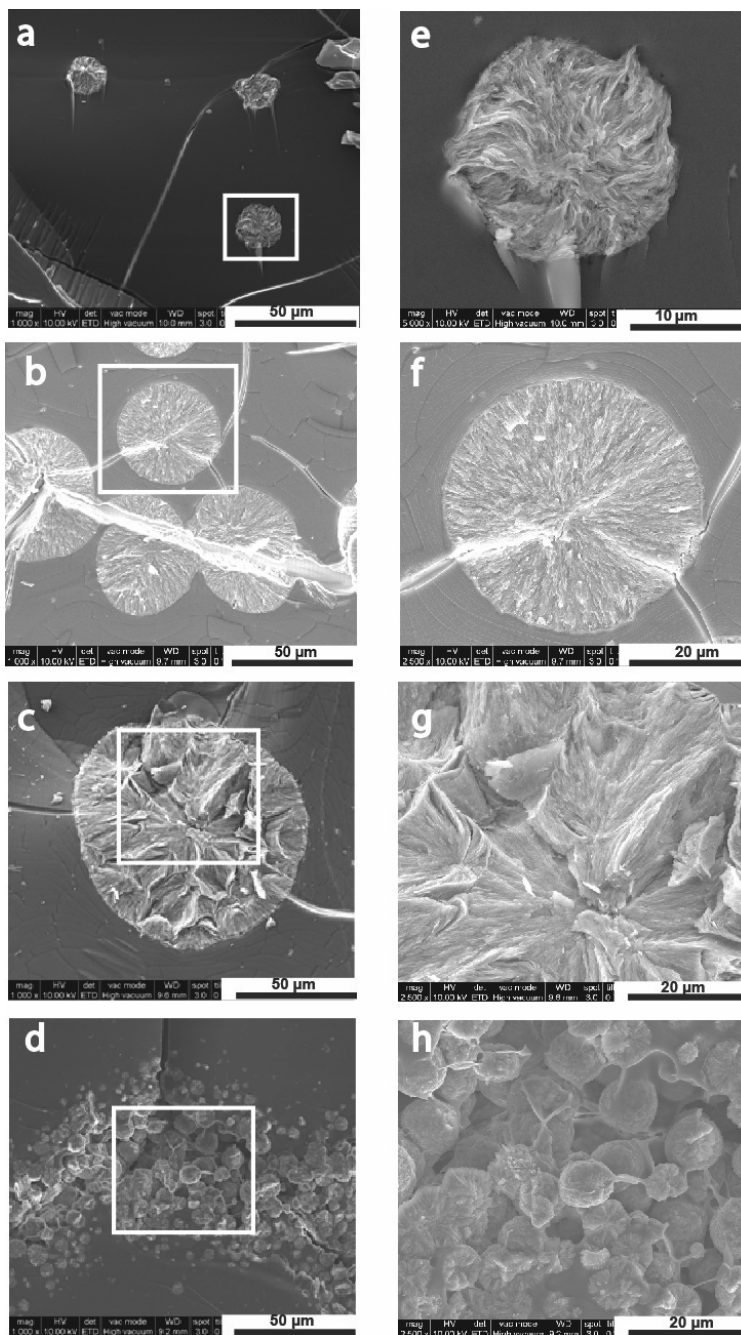

**Figure S7.** SEM micrographs revealing the different mineral nodule sizes and morphologies as a function of the heating rate. **a & e**, Specimen mineralized at 0.5 °C/min where small spherical mineral nodules were formed (type I). **b & f**, Specimen mineralized at 0.2 °C/min where large spherical mineral nodules were formed (type II). **c & g**, Specimen mineralized at 0.05 °C/min where larger spherical mineral domains containing multiple smaller nodules were formed, indicating a departure from a typical type II mineral morphology. **d & h**, Specimen mineralized at 0.02 °C/min where bicontinuous stripe-like mineral aggregates were formed (type III). All mineralized specimens contained the same crosslinker content of 0.265 mol%.



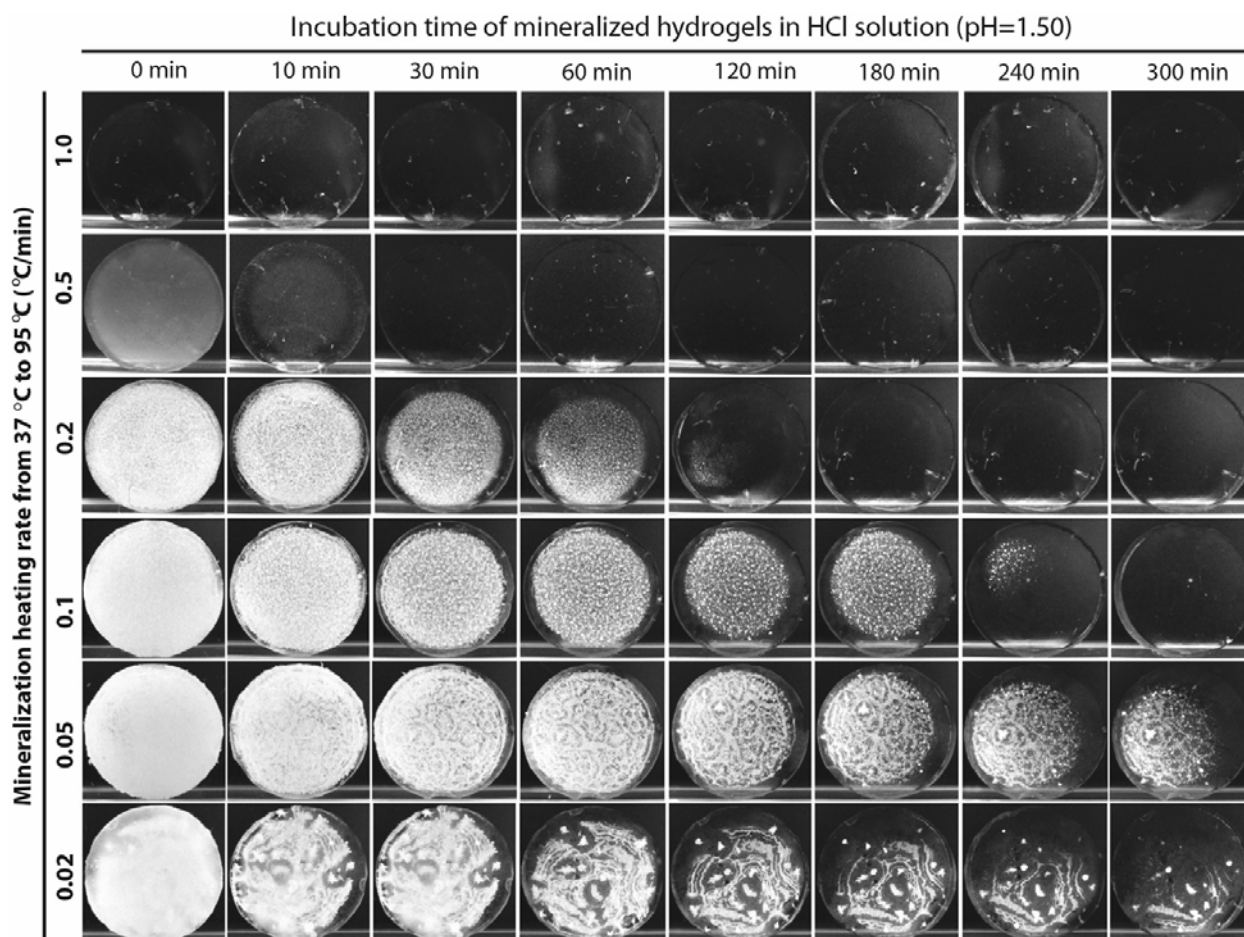

**Figure S8.** Digital photograph images of the mineralized pSBMA hydrogels at various time points of the acid treatment. All mineralized hydrogel specimens contained the same crosslinker content of 0.265 mol%.

Supplementary information

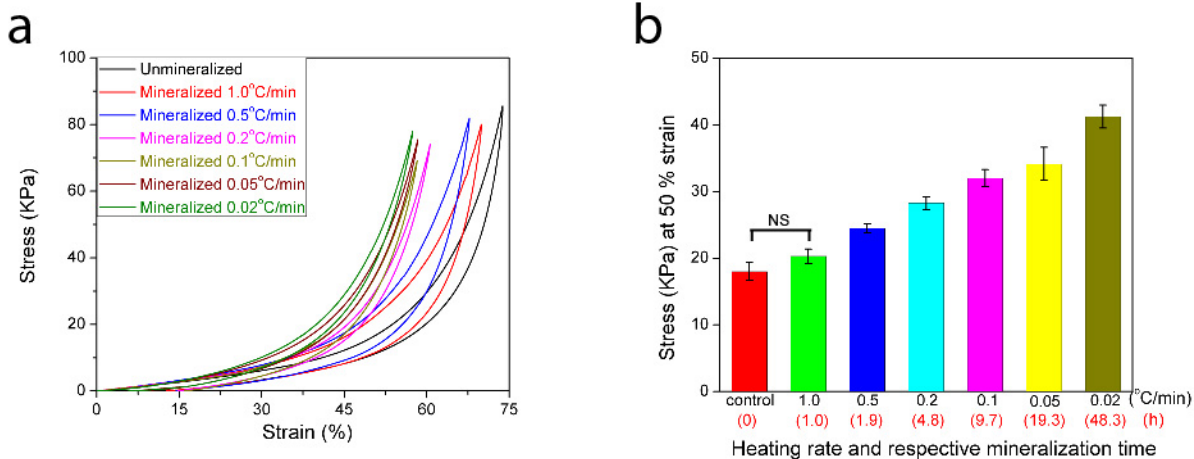

**Figure S9.** Compressive mechanical properties of the mineralized pSBMA hydrogels as a function of the heating rate. **a**, Compressive stress-strain curves of hydrated specimens as a function of the heating rate of their mineralizations. The data were recorded on a Q800 DMA equipped with a submersion compression fixture at 25 °C. **b**, Stress at 50 % compressive strain of the mineralized specimens as a function of the heating rate and the respective mineralization time. Statistical significance was determined by one-way ANOVA with Tukey’s multiple comparison tests. Pairwise comparisons with unmineralized pSBMA hydrogel are statistically significant ( $P < 0.05$ ) unless denoted as NS (not significant). Complete pairwise comparisons are in shown in Supplementary Tables S8. All mineralized hydrogel specimens contained the same crosslinker content of 0.265 mol %.

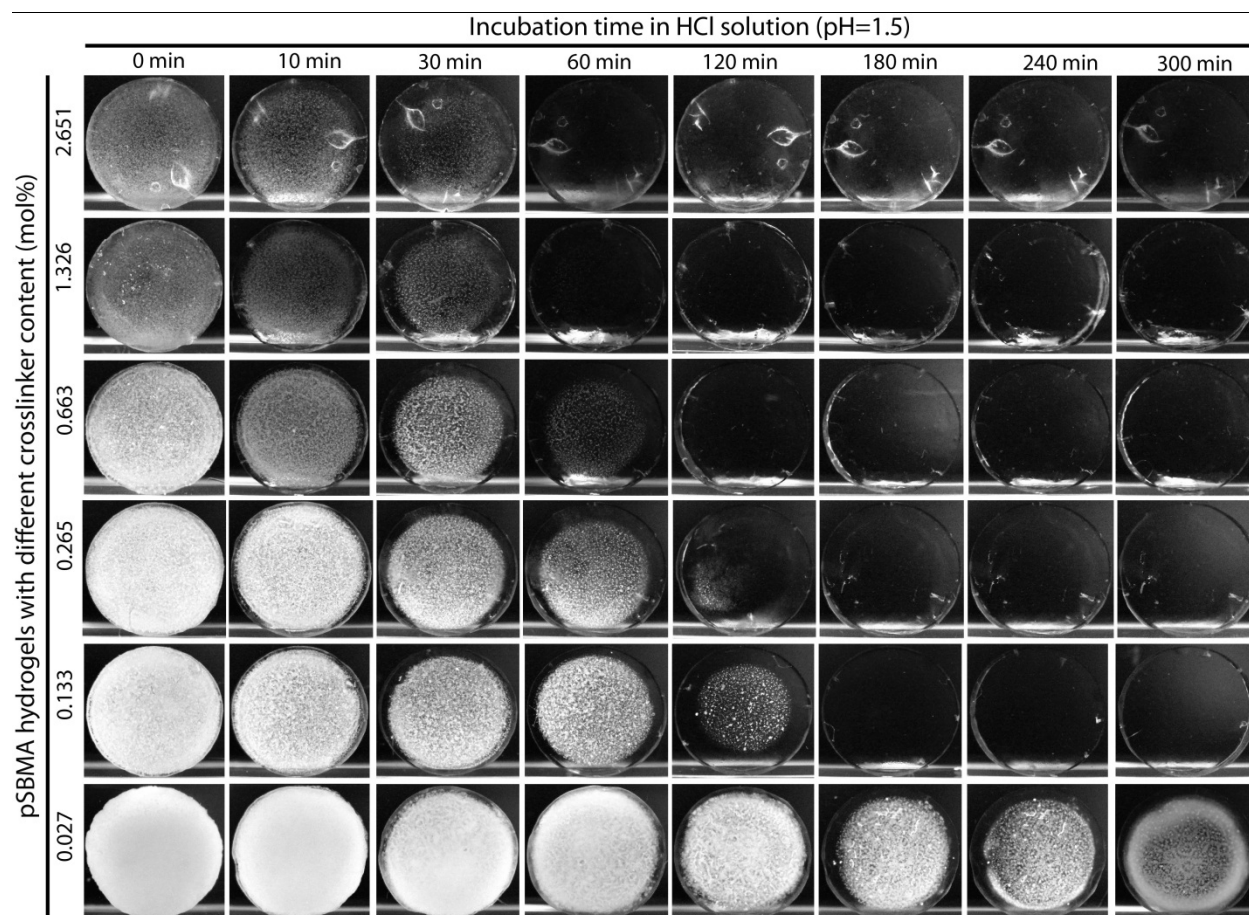

**Figure S10.** Digital photograph images of the mineralized hydrogels with different crosslinker contents at various time points of the acid treatment. All the hydrogel specimens were mineralized with a heating rate of 0.2 °C/min.

Supplementary information

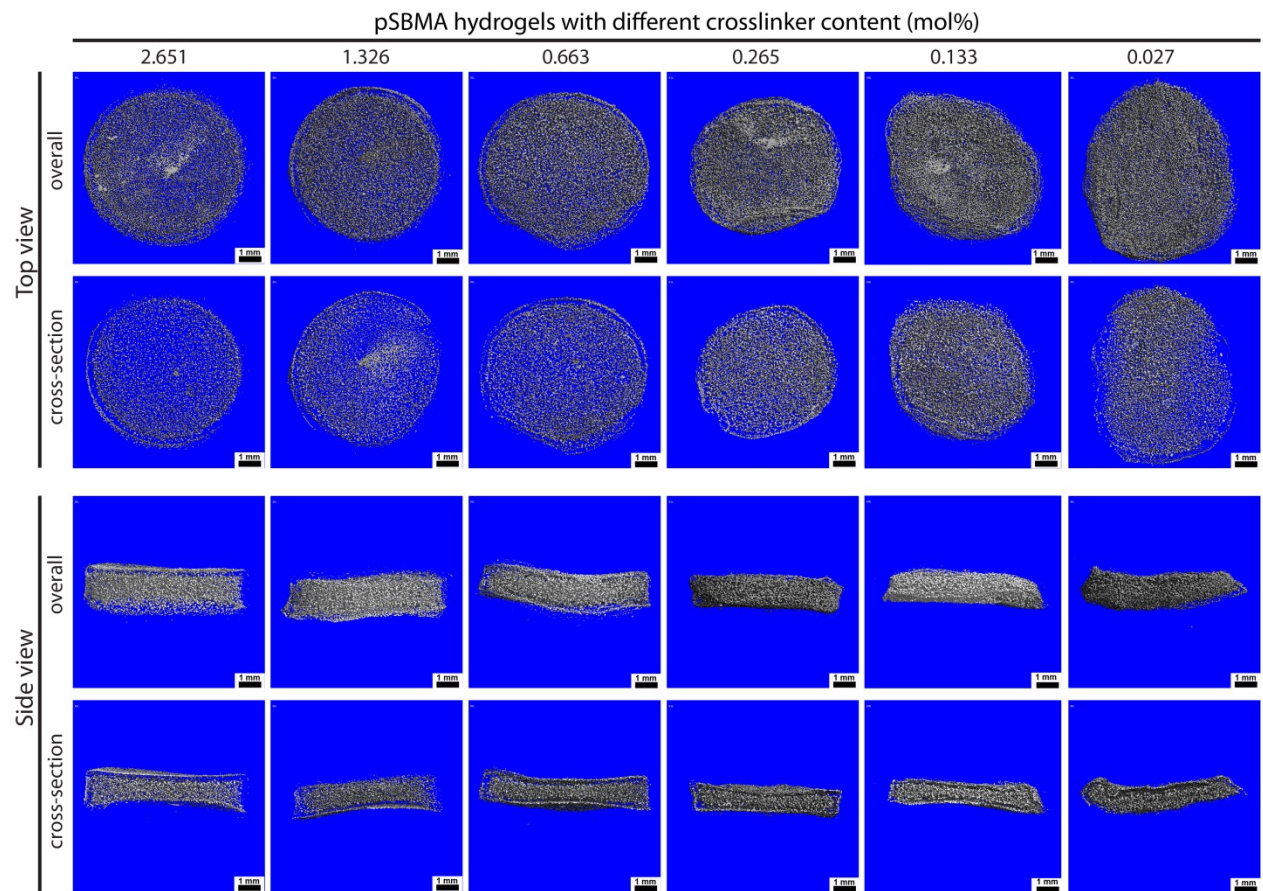

**Figure S11.** Reconstructed  $\mu$ -CT images of mineralized pSBMA hydrogels containing different crosslinker content. All specimens were mineralized with a heating rate of  $0.2\text{ }^{\circ}\text{C}/\text{min}$ .

Supplementary information

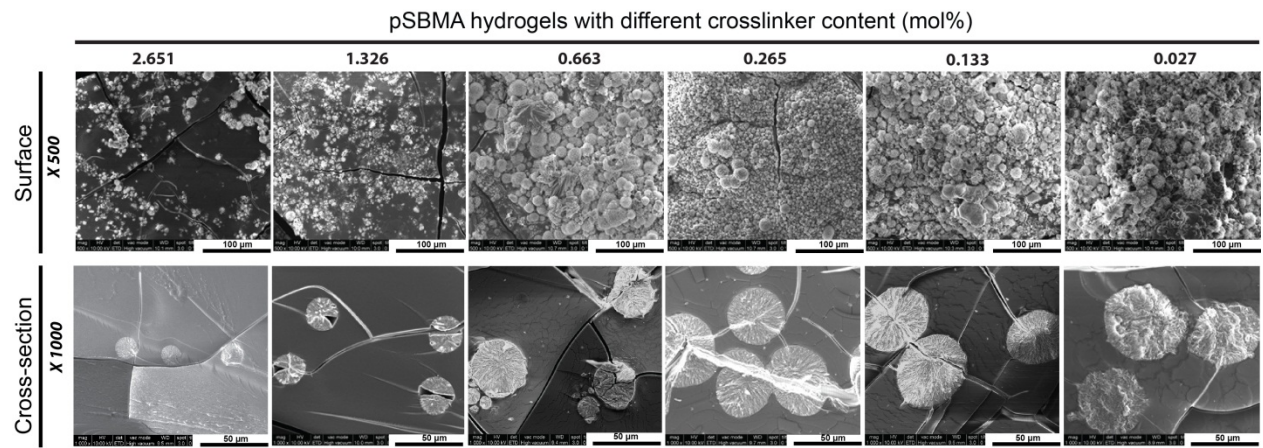

**Figure S12.** SEM micrographs of the surfaces and cross-sections of the mineralized pSBMA hydrogels containing different crosslinker contents. All hydrogel specimens were mineralized with a heating rate of 0.2 °C/min.

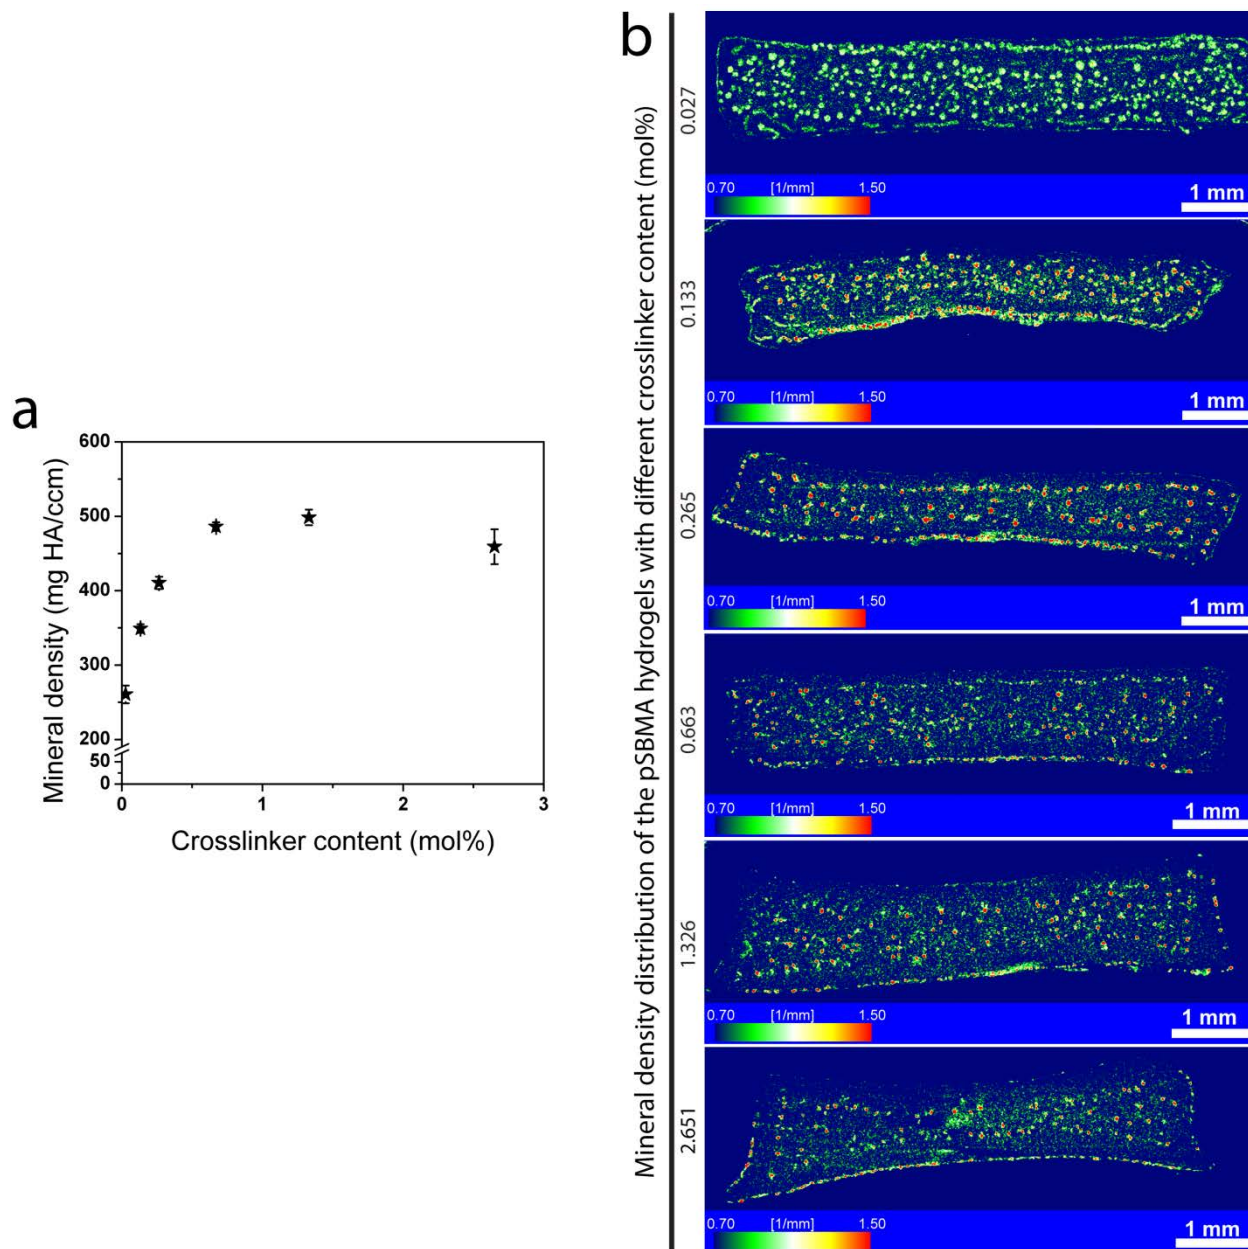

**Figure S13.** Mineral density (a) distribution colored mapping (b) of pSBMA hydrogels as a function of crosslinking content (determined by  $\mu$ -CT). The mineral density increased gradually with the increase of crosslinker content (obviously from 0.027 to 0.265 mol%, but not so clear from 0.265 to 2.651 mol% due to the mineral size). All specimens were mineralized with a heating rate of 0.2 °C/min. Complete pairwise comparisons of mineral density are shown in Supplementary Table S11.

**Table S1.** Preparation of hydrogels with different side chain charges for mineralization (No.1-4) and cyto-compatibility (No. 5-7) studies.

| No. | Monomer | Monomer amount | Crosslinker amount | VA-086 stock solution <sup>c</sup> | Milli-Q water | Cell culture medium <sup>d</sup> |
|-----|---------|----------------|--------------------|------------------------------------|---------------|----------------------------------|
|     |         | (mmol)         | ( $\mu$ L)         | ( $\mu$ L)                         | ( $\mu$ L)    | ( $\mu$ L)                       |
| 1   | HEMA    | 2              | 50 <sup>a</sup>    | 100                                | 1850          | 0                                |
| 2   | SBMA    | 2              | 50 <sup>a</sup>    | 100                                | 1850          | 0                                |
| 3   | TMEAMA  | 2              | 50 <sup>a</sup>    | 100                                | 1850          | 0                                |
| 4   | SPMA    | 2              | 50 <sup>a</sup>    | 100                                | 1850          | 0                                |
| 5   | SBMA    | 2              | 17.9 <sup>b</sup>  | 100                                | 0             | 1882.1                           |
| 6   | TMEAMA  | 2              | 35.8 <sup>b</sup>  | 100                                | 0             | 1864.2                           |
| 7   | SPMA    | 2              | 53.8 <sup>b</sup>  | 100                                | 0             | 1846.2                           |

<sup>a</sup> 10 % (v/v) ethanol solution of EGDMA.

<sup>b</sup> PEGDMA ( $M_n=750$ ; radical inhibitors were removed by passing through an aluminum oxide column).

The amount of PEGDMA used for each hydrogel was adjusted to ensure comparable equilibrated volumes of pSBMA, pTMEAMA, and pSPMA gels in culture media upon cell encapsulation for the cytotoxicity study.

<sup>c</sup> 2 % (w/v) VA-086/PBS solution.

<sup>d</sup>  $\alpha$ -MEM supplemented with 20% FBS, 1% penicillin, 1% streptomycin, and 2% glutamine.

**Table S2.** Preparation and mineralization conditions of zwitterionic pSBMA hydrogels

| No. | SBMA Monomer<br>(g) | EGDMA stock solution <sup>a</sup><br>( $\mu$ L) | Crosslinker content<br>(mol%) | I-2959 stock solution <sup>b</sup><br>( $\mu$ L) | Heating rate<br>( $^{\circ}$ C/min) | Mineralization time <sup>c</sup><br>(min) | Milli-Q water<br>( $\mu$ L) |
|-----|---------------------|-------------------------------------------------|-------------------------------|--------------------------------------------------|-------------------------------------|-------------------------------------------|-----------------------------|
| 1   | 3.36                | 600                                             | 2.651                         | 1200                                             | 0.2                                 | 290                                       | 660                         |
| 2   | 3.36                | 300                                             | 1.326                         | 1200                                             | 0.2                                 | 290                                       | 960                         |
| 3   | 3.36                | 150                                             | 0.663                         | 1200                                             | 0.2                                 | 290                                       | 1110                        |
| 4   | 3.36                | 60                                              | 0.265                         | 1200                                             | 0.2                                 | 290                                       | 1200                        |
| 5   | 3.36                | 30                                              | 0.133                         | 1200                                             | 0.2                                 | 290                                       | 1230                        |
| 6   | 3.36                | 6                                               | 0.027                         | 1200                                             | 0.2                                 | 290                                       | 1254                        |
| 7   | 3.36                | 4.5                                             | 0.020                         | 1200                                             | 0.2                                 | 290                                       | 1255.5                      |
| 8   | 3.36                | 3                                               | 0.013                         | 1200                                             | 0.2                                 | 290                                       | 1257                        |
| 9   | 3.36                | 60                                              | 0.265                         | 1200                                             | 1                                   | 58                                        | 1200                        |
| 10  | 3.36                | 60                                              | 0.265                         | 1200                                             | 0.5                                 | 116                                       | 1200                        |
| 11  | 3.36                | 60                                              | 0.265                         | 1200                                             | 0.2                                 | 290                                       | 1200                        |
| 12  | 3.36                | 60                                              | 0.265                         | 1200                                             | 0.1                                 | 580                                       | 1200                        |
| 13  | 3.36                | 60                                              | 0.265                         | 1200                                             | 0.05                                | 1160                                      | 1200                        |
| 14  | 3.36                | 60                                              | 0.265                         | 1200                                             | 0.02                                | 2900                                      | 1200                        |
| 15  | 3.36                | 6                                               | 0.027                         | 1200                                             | 0.05                                | 1160                                      | 1254                        |

<sup>a</sup> 10 % (v/v) ethanol solution of EGDMA.

<sup>b</sup> 0.25% (w/v) water-acetone (19:1) solution of I-2959.

<sup>c</sup> Total mineralization time from 37-95 $^{\circ}$ C.



Supplementary information

**Table S3.** Sampling intervals for the monitoring of pH changes of the mineralization solution with different heating rates.

|                                   |     |     |     |     |      |      |
|-----------------------------------|-----|-----|-----|-----|------|------|
| Heating rate (°C/min)             | 1.0 | 0.5 | 0.2 | 0.1 | 0.05 | 0.02 |
| Overall mineralization time (min) | 58  | 116 | 290 | 580 | 1160 | 2900 |
| Interval time (min)               | 4   | 8   | 20  | 40  | 80   | 200  |
| Overall time points               | 15  | 15  | 15  | 15  | 15   | 15   |

Supplementary information

**Table S4** Complete statistical significance data (p values) of the mineral volume pairwise comparisons as a function of heating rate (corresponding to Fig. 5c) as determined by one-way ANOVA with Tukey’s multiple comparison tests.

| Comparison of Groups <sup>a</sup> | Mean Diff | SEM     | q Value  | Prob     | Alpha | Sig <sup>b</sup> | LCL      | UCL     |
|-----------------------------------|-----------|---------|----------|----------|-------|------------------|----------|---------|
| 0.2 vs 0.5                        | 4.034     | 0.54536 | 10.46077 | 1.75E-04 | 0.05  | S                | 2.23916  | 5.82884 |
| 0.1 vs 0.5                        | 4.4537    | 0.54536 | 11.54912 | 7.47E-05 | 0.05  | S                | 2.65886  | 6.24854 |
| 0.1 vs 0.2                        | 0.4197    | 0.54536 | 1.08835  | 0.93377  | 0.05  | NS               | -1.37514 | 2.21454 |
| 0.05 vs 0.5                       | 5.41697   | 0.54536 | 14.04701 | 1.30E-05 | 0.05  | S                | 3.62213  | 7.21181 |
| 0.05 vs 0.2                       | 1.38297   | 0.54536 | 3.58624  | 0.15792  | 0.05  | NS               | -0.41187 | 3.17781 |
| 0.05 vs 0.1                       | 0.96327   | 0.54536 | 2.4979   | 0.44078  | 0.05  | NS               | -0.83157 | 2.75811 |
| 0.02 vs 0.5                       | 4.10743   | 0.54536 | 10.65119 | 1.50E-04 | 0.05  | S                | 2.31259  | 5.90227 |
| 0.02 vs 0.2                       | 0.07343   | 0.54536 | 0.19042  | 0.99991  | 0.05  | NS               | -1.72141 | 1.86827 |
| 0.02 vs 0.1                       | -0.34627  | 0.54536 | 0.89792  | 0.96568  | 0.05  | NS               | -2.14111 | 1.44857 |
| 0.02 vs 0.05                      | -1.30953  | 0.54536 | 3.39582  | 0.19198  | 0.05  | NS               | -3.10437 | 0.48531 |

<sup>a</sup> The different experimental groups are referred to as “X vs Y”, where X and Y stand for the respective heating rate (°C/min).

<sup>b</sup> S indicates  $p < 0.05$  (significant); NS indicates  $p > 0.05$  (not significant).

**Table S5.** Complete statistical significance data (p values) of the calcium content pairwise comparisons as a function of heating rate (corresponding to Fig. 5d) as determined by one-way ANOVA with Tukey's multiple comparison tests.

| Comparison of Groups <sup>a</sup> | Mean Diff | SEM     | q Value  | Prob     | Alpha | Sig <sup>b</sup> | LCL      | UCL     |
|-----------------------------------|-----------|---------|----------|----------|-------|------------------|----------|---------|
| 0.5 vs 1                          | 0.1052    | 0.06855 | 2.17039  | 0.65095  | 0.05  | NS               | -0.12505 | 0.33545 |
| 0.2 vs 1                          | 0.52673   | 0.06855 | 10.8671  | 6.48E-05 | 0.05  | S                | 0.29649  | 0.75698 |
| 0.2 vs 0.5                        | 0.42153   | 0.06855 | 8.69671  | 5.45E-04 | 0.05  | S                | 0.19129  | 0.65178 |
| 0.1 vs 1                          | 0.7996    | 0.06855 | 16.49664 | 7.08E-07 | 0.05  | S                | 0.56935  | 1.02985 |
| 0.1 vs 0.5                        | 0.6944    | 0.06855 | 14.32625 | 3.60E-06 | 0.05  | S                | 0.46415  | 0.92465 |
| 0.1 vs 0.2                        | 0.27287   | 0.06855 | 5.62955  | 0.01752  | 0.05  | S                | 0.04262  | 0.50311 |
| 0.05 vs 1                         | 0.8674    | 0.06855 | 17.89543 | 3.24E-07 | 0.05  | S                | 0.63715  | 1.09765 |
| 0.05 vs 0.5                       | 0.7622    | 0.06855 | 15.72504 | 1.26E-06 | 0.05  | S                | 0.53195  | 0.99245 |
| 0.05 vs 0.2                       | 0.34067   | 0.06855 | 7.02834  | 0.0034   | 0.05  | S                | 0.11042  | 0.57091 |
| 0.05 vs 0.1                       | 0.0678    | 0.06855 | 1.39879  | 0.91288  | 0.05  | NS               | -0.16245 | 0.29805 |
| 0.02 vs 1                         | 0.7942    | 0.06855 | 16.38524 | 7.70E-07 | 0.05  | S                | 0.56395  | 1.02445 |
| 0.02 vs 0.5                       | 0.689     | 0.06855 | 14.21484 | 3.92E-06 | 0.05  | S                | 0.45875  | 0.91925 |
| 0.02 vs 0.2                       | 0.26747   | 0.06855 | 5.51814  | 0.02001  | 0.05  | S                | 0.03722  | 0.49771 |
| 0.02 vs 0.1                       | -0.0054   | 0.06855 | 0.11141  | 1        | 0.05  | NS               | -0.23565 | 0.22485 |
| 0.02 vs 0.05                      | -0.0732   | 0.06855 | 1.5102   | 0.88491  | 0.05  | NS               | -0.30345 | 0.15705 |

<sup>a</sup> The different experimental groups are referred to as "X vs Y", where X and Y stand for the respective heating rate (°C/min).

<sup>b</sup> S indicates  $p < 0.05$  (significant); NS indicates  $p > 0.05$  (not significant).

Supplementary information

**Table S6.** Complete statistical significance data (p values) of the mineral density pairwise comparisons as a function of heating rate (corresponding to Supplementary Fig. 5e) as determined by one-way ANOVA with Tukey's multiple comparison tests.

| Comparison of Groups <sup>a</sup> | Mean Diff | SEM      | q Value | Prob     | Alpha | Sig <sup>b</sup> | LCL      | UCL      |
|-----------------------------------|-----------|----------|---------|----------|-------|------------------|----------|----------|
| 0.2 vs 0.5                        | 34.85333  | 21.91505 | 2.24914 | 0.53417  | 0.05  | NS               | -37.2709 | 106.9775 |
| 0.1 vs 0.5                        | 85.19043  | 21.91505 | 5.49748 | 0.01986  | 0.05  | S                | 13.06623 | 157.3146 |
| 0.1 vs 0.2                        | 50.3371   | 21.91505 | 3.24833 | 0.22254  | 0.05  | NS               | -21.7871 | 122.4613 |
| 0.05 vs 0.5                       | 88.58147  | 21.91505 | 5.71631 | 0.01567  | 0.05  | S                | 16.45726 | 160.7057 |
| 0.05 vs 0.2                       | 53.72813  | 21.91505 | 3.46716 | 0.17853  | 0.05  | NS               | -18.3961 | 125.8523 |
| 0.05 vs 0.1                       | 3.39103   | 21.91505 | 0.21883 | 0.99985  | 0.05  | NS               | -68.7332 | 75.51524 |
| 0.02 vs 0.5                       | 140.2873  | 21.91505 | 9.05296 | 5.78E-04 | 0.05  | S                | 68.16306 | 212.4115 |
| 0.02 vs 0.2                       | 105.4339  | 21.91505 | 6.80382 | 0.00498  | 0.05  | S                | 33.30973 | 177.5581 |
| 0.02 vs 0.1                       | 55.09683  | 21.91505 | 3.55549 | 0.16303  | 0.05  | NS               | -17.0274 | 127.221  |
| 0.02 vs 0.05                      | 51.7058   | 21.91505 | 3.33666 | 0.20378  | 0.05  | NS               | -20.4184 | 123.83   |

<sup>a</sup> The different experimental groups are referred to as "X vs Y", where X and Y stand for the respective heating rate (°C/min).

<sup>b</sup> S indicates  $p < 0.05$  (significant); NS indicates  $p > 0.05$  (not significant).

Supplementary information

**Table S7.** Complete statistical significance data (p values) of the mineral anisotropy pairwise comparisons as a function of heating rate (corresponding to Fig. 5f) as determined by one-way ANOVA with Tukey's multiple comparison tests.

| Comparison of Groups <sup>a</sup> | Mean Diff | SEM     | q Value  | Prob     | Alpha | Sig <sup>b</sup> | LCL      | UCL     |
|-----------------------------------|-----------|---------|----------|----------|-------|------------------|----------|---------|
| 0.2 vs 0.5                        | 0.01047   | 0.03599 | 0.41125  | 0.99816  | 0.05  | NS               | -0.10799 | 0.12892 |
| 0.1 vs 0.5                        | 0.09867   | 0.03599 | 3.87676  | 0.11633  | 0.05  | NS               | -0.01979 | 0.21712 |
| 0.1 vs 0.2                        | 0.0882    | 0.03599 | 3.46551  | 0.17883  | 0.05  | NS               | -0.03026 | 0.20666 |
| 0.05 vs 0.5                       | 0.1633    | 0.03599 | 6.4163   | 0.00744  | 0.05  | S                | 0.04484  | 0.28176 |
| 0.05 vs 0.2                       | 0.15283   | 0.03599 | 6.00505  | 0.0115   | 0.05  | S                | 0.03438  | 0.27129 |
| 0.05 vs 0.1                       | 0.06463   | 0.03599 | 2.53954  | 0.42599  | 0.05  | NS               | -0.05382 | 0.18309 |
| 0.02 vs 0.5                       | 0.37287   | 0.03599 | 14.65048 | 8.86E-06 | 0.05  | S                | 0.25441  | 0.49132 |
| 0.02 vs 0.2                       | 0.3624    | 0.03599 | 14.23923 | 1.15E-05 | 0.05  | S                | 0.24394  | 0.48086 |
| 0.02 vs 0.1                       | 0.2742    | 0.03599 | 10.77372 | 1.36E-04 | 0.05  | S                | 0.15574  | 0.39266 |
| 0.02 vs 0.05                      | 0.20957   | 0.03599 | 8.23418  | 0.00122  | 0.05  | S                | 0.09111  | 0.32802 |

<sup>a</sup> The different experimental groups are referred to as "X vs Y", where X and Y stand for the respective heating rate (°C/min).

<sup>b</sup> S indicates  $p < 0.05$  (significant); NS indicates  $p > 0.05$  (not significant).

**Table S8.** Complete statistical significance data (p values) of the mechanical property pairwise comparisons as a function of heating rate (corresponding to Supplementary Figure S8b) as determined by one-way ANOVA with Tukey's multiple comparison tests.

| Comparison of Groups <sup>a</sup> | Mean Diff | SEM    | q Value  | Prob     | Alpha | Sig <sup>b</sup> | LCL      | UCL      |
|-----------------------------------|-----------|--------|----------|----------|-------|------------------|----------|----------|
| 1 vs control                      | 2.3       | 1.4682 | 2.21543  | 0.70375  | 0.05  | NS               | -2.7133  | 7.3133   |
| 0.5 vs control                    | 6.48      | 1.4682 | 6.24172  | 0.00817  | 0.05  | S                | 1.4667   | 11.4933  |
| 0.5 vs 1                          | 4.18      | 1.4682 | 4.0263   | 0.13304  | 0.05  | NS               | -0.8333  | 9.1933   |
| 0.2 vs control                    | 10.27667  | 1.4682 | 9.89878  | 1.00E-04 | 0.05  | S                | 5.26337  | 15.28997 |
| 0.2 vs 1                          | 7.97667   | 1.4682 | 7.68335  | 0.00133  | 0.05  | S                | 2.96337  | 12.98997 |
| 0.2 vs 0.5                        | 3.79667   | 1.4682 | 3.65706  | 0.20213  | 0.05  | NS               | -1.21663 | 8.80997  |
| 0.1 vs control                    | 14.03333  | 1.4682 | 13.51731 | 2.66E-06 | 0.05  | S                | 9.02003  | 19.04663 |
| 0.1 vs 1                          | 11.73333  | 1.4682 | 11.30188 | 2.27E-05 | 0.05  | S                | 6.72003  | 16.74663 |
| 0.1 vs 0.5                        | 7.55333   | 1.4682 | 7.27559  | 0.0022   | 0.05  | S                | 2.54003  | 12.56663 |
| 0.1 vs 0.2                        | 3.75667   | 1.4682 | 3.61853  | 0.2108   | 0.05  | NS               | -1.25663 | 8.76997  |
| 0.05 vs control                   | 16.14667  | 1.4682 | 15.55293 | 4.24E-07 | 0.05  | S                | 11.13337 | 21.15997 |
| 0.05 vs 1                         | 13.84667  | 1.4682 | 13.3375  | 3.15E-06 | 0.05  | S                | 8.83337  | 18.85997 |
| 0.05 vs 0.5                       | 9.66667   | 1.4682 | 9.31121  | 1.93E-04 | 0.05  | S                | 4.65337  | 14.67997 |
| 0.05 vs 0.2                       | 5.87      | 1.4682 | 5.65415  | 0.01742  | 0.05  | S                | 0.8567   | 10.8833  |
| 0.05 vs 0.1                       | 2.11333   | 1.4682 | 2.03562  | 0.77316  | 0.05  | NS               | -2.89997 | 7.12663  |
| 0.02 vs control                   | 23.25333  | 1.4682 | 22.39827 | 3.43E-07 | 0.05  | S                | 18.24003 | 28.26663 |
| 0.02 vs 1                         | 20.95333  | 1.4682 | 20.18285 | 1.18E-07 | 0.05  | S                | 15.94003 | 25.96663 |
| 0.02 vs 0.5                       | 16.77333  | 1.4682 | 16.15655 | 2.66E-07 | 0.05  | S                | 11.76003 | 21.78663 |
| 0.02 vs 0.2                       | 12.97667  | 1.4682 | 12.49949 | 6.94E-06 | 0.05  | S                | 7.96337  | 17.98997 |
| 0.02 vs 0.1                       | 9.22      | 1.4682 | 8.88097  | 3.17E-04 | 0.05  | S                | 4.2067   | 14.2333  |
| 0.02 vs 0.05                      | 7.10667   | 1.4682 | 6.84534  | 0.00378  | 0.05  | S                | 2.09337  | 12.11997 |

<sup>a</sup> The different experimental groups are referred to as "X vs Y", where X and Y stand for the respective heating rate (°C/min), while "control" is the unmineralized pSBMA hydrogel.

<sup>b</sup> S indicates  $p < 0.05$  (significant); NS indicates  $p > 0.05$  (not significant).

**Table S9.** Complete statistical significance data (p values) of the mineral volume pairwise comparisons as a function of crosslinker content (corresponding to Fig. 6d) as determined by one-way ANOVA with Tukey's multiple comparison tests.

| Comparison of Groups <sup>a</sup> | Mean Diff | SEM     | q Value  | Prob     | Alpha | Sig <sup>b</sup> | LCL      | UCL     |
|-----------------------------------|-----------|---------|----------|----------|-------|------------------|----------|---------|
| 1.326 vs 2.651                    | 0.54723   | 0.39724 | 1.94822  | 0.73894  | 0.05  | NS               | -0.78705 | 1.88152 |
| 0.663 vs 2.651                    | 0.84683   | 0.39724 | 3.01484  | 0.33398  | 0.05  | NS               | -0.48745 | 2.18112 |
| 0.663 vs 1.326                    | 0.2996    | 0.39724 | 1.06661  | 0.97033  | 0.05  | NS               | -1.03469 | 1.63389 |
| 0.265 vs 2.651                    | 2.90927   | 0.39724 | 10.35736 | 1.04E-04 | 0.05  | S                | 1.57498  | 4.24355 |
| 0.265 vs 1.326                    | 2.36203   | 0.39724 | 8.40914  | 7.39E-04 | 0.05  | S                | 1.02775  | 3.69632 |
| 0.265 vs 0.663                    | 2.06243   | 0.39724 | 7.34253  | 0.00238  | 0.05  | S                | 0.72815  | 3.39672 |
| 0.133 vs 2.651                    | 3.9868    | 0.39724 | 14.19352 | 3.99E-06 | 0.05  | S                | 2.65251  | 5.32109 |
| 0.133 vs 1.326                    | 3.43957   | 0.39724 | 12.2453  | 1.92E-05 | 0.05  | S                | 2.10528  | 4.77385 |
| 0.133 vs 0.663                    | 3.13997   | 0.39724 | 11.17868 | 4.88E-05 | 0.05  | S                | 1.80568  | 4.47425 |
| 0.133 vs 0.265                    | 1.07753   | 0.39724 | 3.83616  | 0.14337  | 0.05  | NS               | -0.25675 | 2.41182 |
| 0.027 vs 2.651                    | 3.59913   | 0.39724 | 12.81338 | 1.20E-05 | 0.05  | S                | 2.26485  | 4.93342 |
| 0.027 vs 1.326                    | 3.0519    | 0.39724 | 10.86516 | 6.49E-05 | 0.05  | S                | 1.71761  | 4.38619 |
| 0.027 vs 0.663                    | 2.7523    | 0.39724 | 9.79854  | 1.79E-04 | 0.05  | S                | 1.41801  | 4.08659 |
| 0.027 vs 0.265                    | 0.68987   | 0.39724 | 2.45601  | 0.5354   | 0.05  | NS               | -0.64442 | 2.02415 |
| 0.027 vs 0.133                    | -0.38767  | 0.39724 | 1.38014  | 0.91713  | 0.05  | NS               | -1.72195 | 0.94662 |

<sup>a</sup> The different experimental groups are referred to as "X vs Y", where X and Y stand for the respective crosslinker content (mol%).

<sup>b</sup> S indicates  $p < 0.05$  (significant); NS indicates  $p > 0.05$  (not significant).

Supplementary information

**Table S10.** Complete statistical significance data (p values) of the calcium content pairwise comparisons as a function of crosslinker content (corresponding to Fig. 6e) as determined by one-way ANOVA with Tukey's multiple comparison tests.

| Comparison of Groups <sup>a</sup> | Mean Diff | SEM     | q Value  | Prob     | Alpha | Sig <sup>b</sup> | LCL      | UCL     |
|-----------------------------------|-----------|---------|----------|----------|-------|------------------|----------|---------|
| 1.326 vs 2.651                    | 0.15893   | 0.05492 | 4.09227  | 0.10756  | 0.05  | NS               | -0.02555 | 0.34342 |
| 0.663 vs 2.651                    | 0.14113   | 0.05492 | 3.63395  | 0.17872  | 0.05  | NS               | -0.04335 | 0.32562 |
| 0.663 vs 1.326                    | -0.0178   | 0.05492 | 0.45832  | 0.99939  | 0.05  | NS               | -0.20229 | 0.16669 |
| 0.265 vs 2.651                    | 0.35167   | 0.05492 | 9.05484  | 3.76E-04 | 0.05  | S                | 0.16718  | 0.53615 |
| 0.265 vs 1.326                    | 0.19273   | 0.05492 | 4.96257  | 0.03885  | 0.05  | S                | 0.00825  | 0.37722 |
| 0.265 vs 0.663                    | 0.21053   | 0.05492 | 5.42089  | 0.02248  | 0.05  | S                | 0.02605  | 0.39502 |
| 0.133 vs 2.651                    | 0.56207   | 0.05492 | 14.47229 | 3.22E-06 | 0.05  | S                | 0.37758  | 0.74655 |
| 0.133 vs 1.326                    | 0.40313   | 0.05492 | 10.38002 | 1.02E-04 | 0.05  | S                | 0.21865  | 0.58762 |
| 0.133 vs 0.663                    | 0.42093   | 0.05492 | 10.83834 | 6.65E-05 | 0.05  | S                | 0.23645  | 0.60542 |
| 0.133 vs 0.265                    | 0.2104    | 0.05492 | 5.41745  | 0.02257  | 0.05  | S                | 0.02591  | 0.39489 |
| 0.027 vs 2.651                    | 0.92847   | 0.05492 | 23.90649 | 2.39E-07 | 0.05  | S                | 0.74398  | 1.11295 |
| 0.027 vs 1.326                    | 0.76953   | 0.05492 | 19.81421 | 1.16E-07 | 0.05  | S                | 0.58505  | 0.95402 |
| 0.027 vs 0.663                    | 0.78733   | 0.05492 | 20.27253 | 2.54E-07 | 0.05  | S                | 0.60285  | 0.97182 |
| 0.027 vs 0.265                    | 0.5768    | 0.05492 | 14.85165 | 2.42E-06 | 0.05  | S                | 0.39231  | 0.76129 |
| 0.027 vs 0.133                    | 0.3664    | 0.05492 | 9.4342   | 2.56E-04 | 0.05  | S                | 0.18191  | 0.55089 |

<sup>a</sup> The different experimental groups are referred to as "X vs Y", where X and Y stand for the respective crosslinker content (mol%).

<sup>b</sup> S indicates  $p < 0.05$  (significant); NS indicates  $p > 0.05$  (not significant).



Supplementary information

**Table S11.** Complete statistical significance data (p values) of the mineral density pairwise comparisons as a function of crosslinker content (corresponding to Supplementary Fig. S13a) as determined by one-way ANOVA with Tukey's multiple comparison tests.

| Comparison of Groups <sup>a</sup> | Mean Diff | SEM      | q Value  | Prob     | Alpha | Sig <sup>b</sup> | LCL      | UCL      |
|-----------------------------------|-----------|----------|----------|----------|-------|------------------|----------|----------|
| 1.326 vs 2.651                    | 39.262    | 12.30355 | 4.51291  | 0.06614  | 0.05  | NS               | -2.06465 | 80.58865 |
| 0.663 vs 2.651                    | 27.004    | 12.30355 | 3.10393  | 0.30696  | 0.05  | NS               | -14.3227 | 68.33065 |
| 0.663 vs 1.326                    | -12.258   | 12.30355 | 1.40898  | 0.9105   | 0.05  | NS               | -53.5847 | 29.06865 |
| 0.265 vs 2.651                    | -48.6787  | 12.30355 | 5.5953   | 0.01825  | 0.05  | S                | -90.0053 | -7.35202 |
| 0.265 vs 1.326                    | -87.9407  | 12.30355 | 10.10821 | 1.32E-04 | 0.05  | S                | -129.267 | -46.614  |
| 0.265 vs 0.663                    | -75.6827  | 12.30355 | 8.69923  | 5.44E-04 | 0.05  | S                | -117.009 | -34.356  |
| 0.133 vs 2.651                    | -110.069  | 12.30355 | 12.65176 | 1.37E-05 | 0.05  | S                | -151.396 | -68.7427 |
| 0.133 vs 1.326                    | -149.331  | 12.30355 | 17.16467 | 4.24E-07 | 0.05  | S                | -190.658 | -108.005 |
| 0.133 vs 0.663                    | -137.073  | 12.30355 | 15.75569 | 1.23E-06 | 0.05  | S                | -178.4   | -95.7467 |
| 0.133 vs 0.265                    | -61.3907  | 12.30355 | 7.05646  | 0.00329  | 0.05  | S                | -102.717 | -20.064  |
| 0.027 vs 2.651                    | -195.468  | 12.30355 | 22.46778 | 9.89E-07 | 0.05  | S                | -236.795 | -154.141 |
| 0.027 vs 1.326                    | -234.73   | 12.30355 | 26.98069 | 0        | 0.05  | S                | -276.057 | -193.403 |
| 0.027 vs 0.663                    | -222.472  | 12.30355 | 25.57171 | 9.85E-08 | 0.05  | S                | -263.799 | -181.145 |
| 0.027 vs 0.265                    | -146.789  | 12.30355 | 16.87248 | 5.32E-07 | 0.05  | S                | -188.116 | -105.463 |
| 0.027 vs 0.133                    | -85.3987  | 12.30355 | 9.81602  | 1.76E-04 | 0.05  | S                | -126.725 | -44.072  |

<sup>a</sup> The different experimental groups are referred to as "X vs Y", where X and Y stand for the respective crosslinker content (mol%).

<sup>b</sup> S indicates  $p < 0.05$  (significant); NS indicates  $p > 0.05$  (not significant).
